# Supplementary material for: Improved sodium-ion storage properties by fabricating nanoporous CuSn alloy architecture
Source: Royal Society of Chemistry journal article supplement (doi:10.1039/c7ra03718j), 2017-01-01
Supplement: c7ra03718j1.pdf [file c7ra03718j1.pdf]

Supplementary Information

**Improved Sodium-Ion Storage Properties by Fabricating  
Nanoporous CuSn Alloy Architecture**

Ruie Zhang <sup>a</sup>, Zhifeng Wang <sup>a</sup>, Wenqing Ma <sup>a</sup>, Wei Yu <sup>a</sup>, Shanshan Lu <sup>a</sup>, Xizheng  
Liu<sup>a,b</sup>\*

<sup>a</sup> Tianjin Key Laboratory of Advanced Functional Porous Materials, Institute for New  
Energy Materials and Low-Carbon Technologies, School of Materials Science and  
Engineering, Tianjin University of Technology, Tianjin 300384, P.R. China.

<sup>b</sup> Key Laboratory of Advanced Energy Materials Chemistry (Ministry of Education),  
Nankai University, Tianjin 300071, P.R. China.

\* Corresponding author: xzliu@tjut.edu.cn

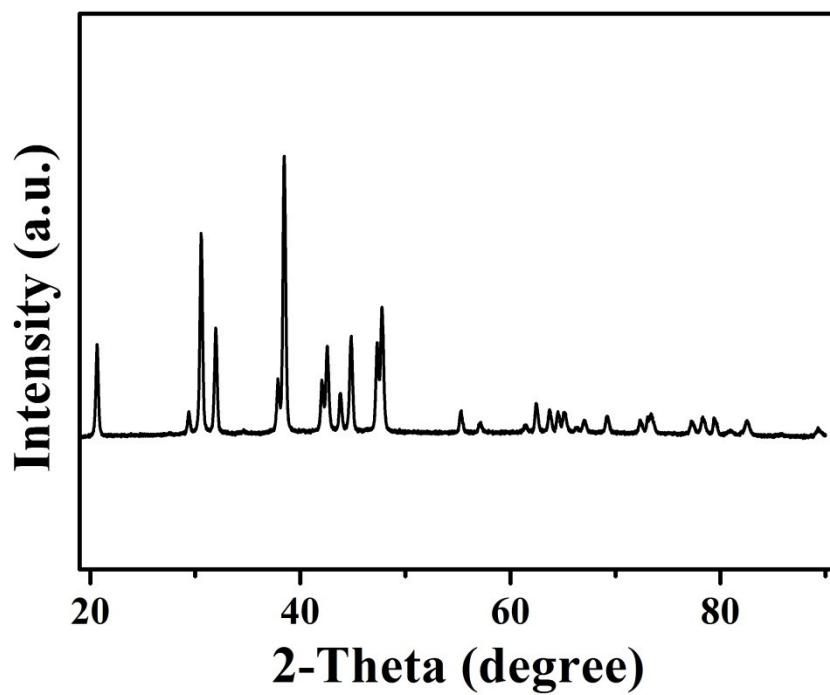

Fig.S1 The XRD pattern of CuSnAl alloy precursor.

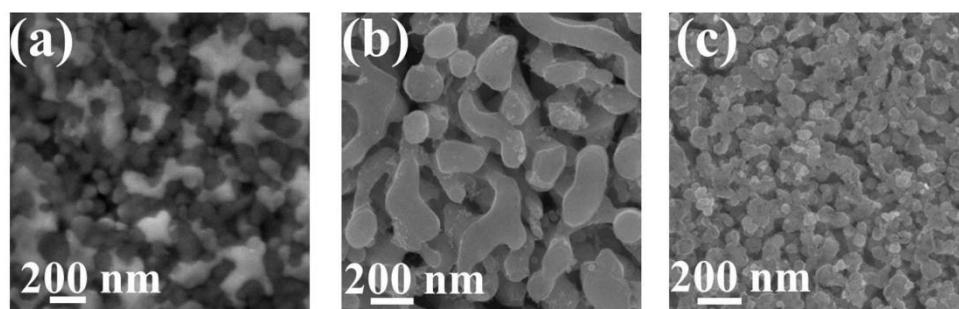

Fig.S2 Morphological characterizations of CuSn anodes: SEM image of CuSnAl alloy precursor (a), CS12 (b) and CS48 (c) .

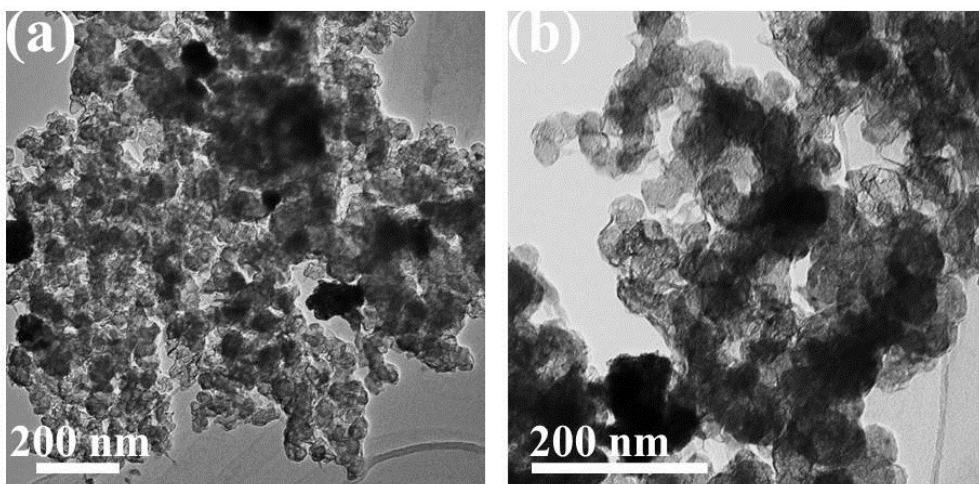

Fig.S3 TEM images of CS24 nanoporous composites at different magnifications.

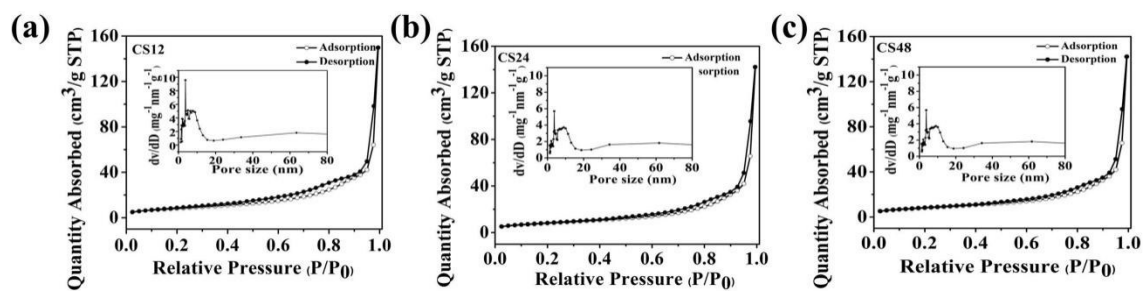

Fig. S4 The  $N_2$  adsorption-desorption isotherms of (a) CS12, (b) CS24 and (c) CS48.

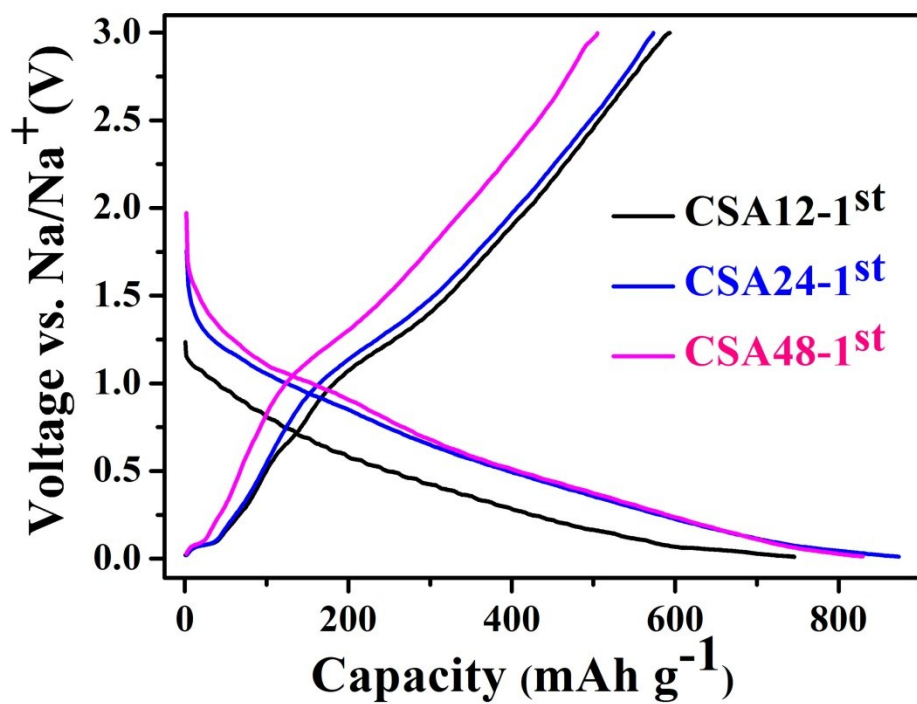

Fig.S5 Galvanostatic discharge/charge curves for CS12, CS24, CS48 electrodes of the first cycle at a current density of 50 mA g<sup>-1</sup>.

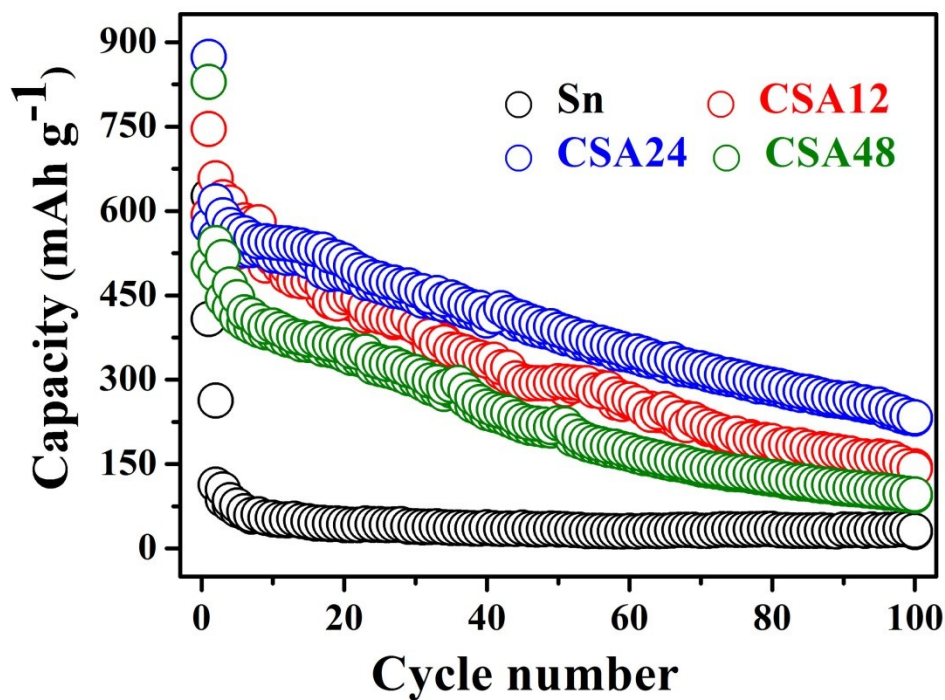

Fig.S6 Cycling performance comparison of pure Sn, CS12, CS24 and CS48 electrodes at a density

of 50 mA g<sup>-1</sup>.

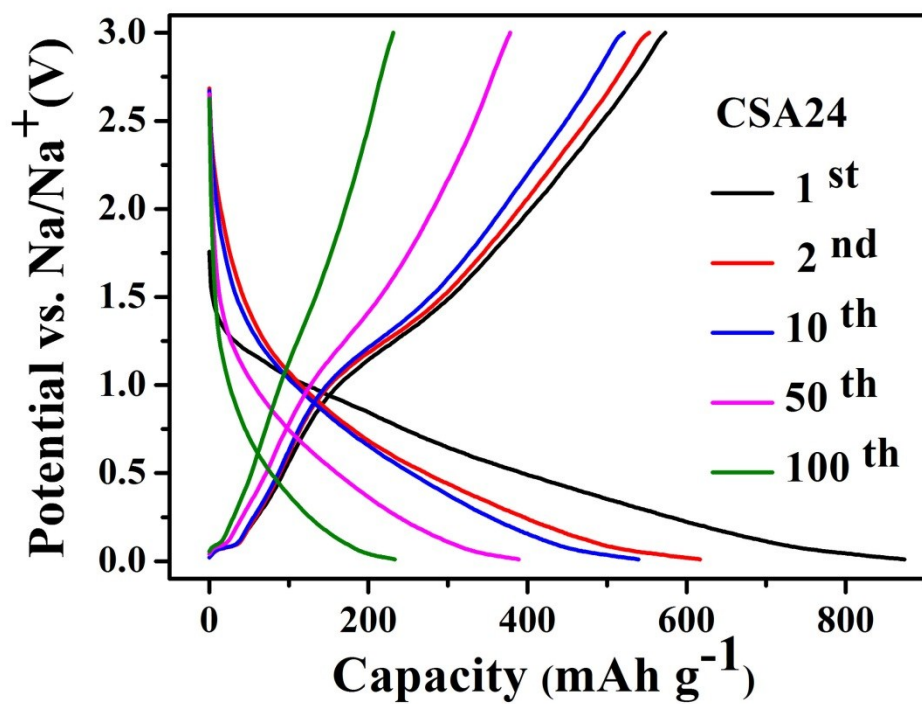

Fig.S7 Galvanostatic discharge/charge curves of CSA24 at a current density of 50 mA g<sup>-1</sup>.

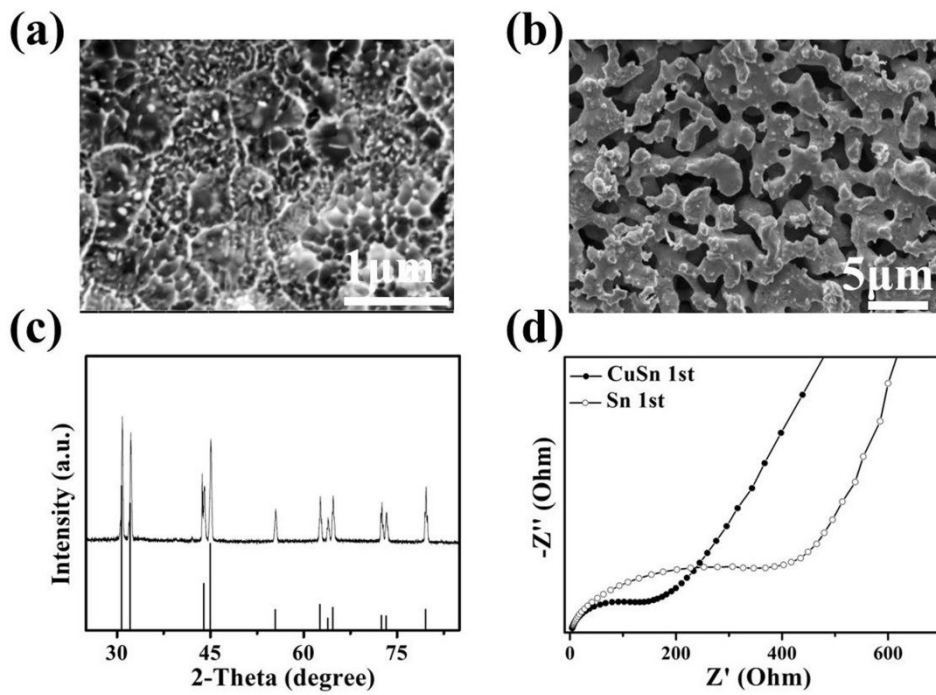

Fig. S8. SEM image of SnAl alloy precursor: (a) before etching, (b) after etching 24h. (c) XRD patterns of SnAl-24, (d) Nyquist plots of SnAl-24 and CS24 after the initial formation cycle.

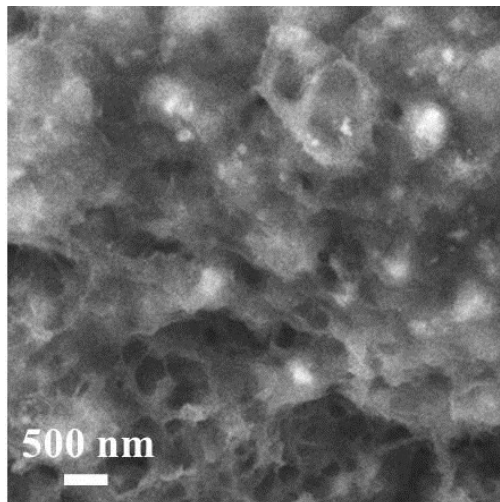

Fig.S9 SEM image of CS24 electrode after 100 discharge /charge cycles at a current density of 50 mA g<sup>-1</sup>.

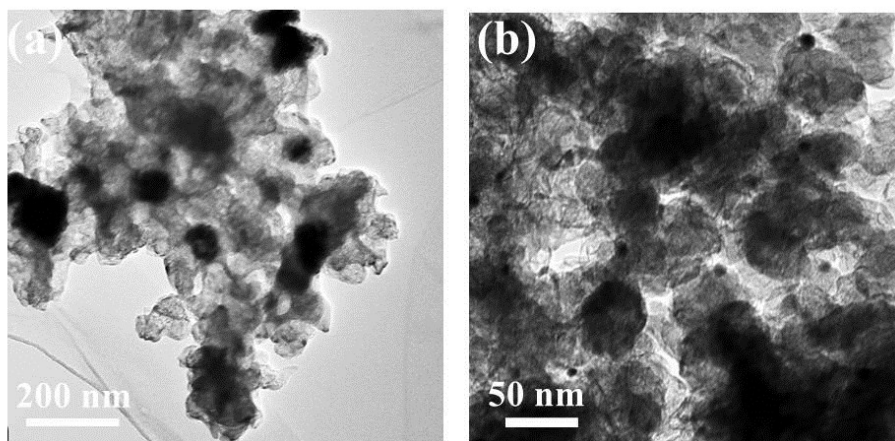

Fig.S10 Low-magnification TEM images of CSA24 electrode after the first discharged to 0.05 V cycles at a current density of 50 mA g<sup>-1</sup>.

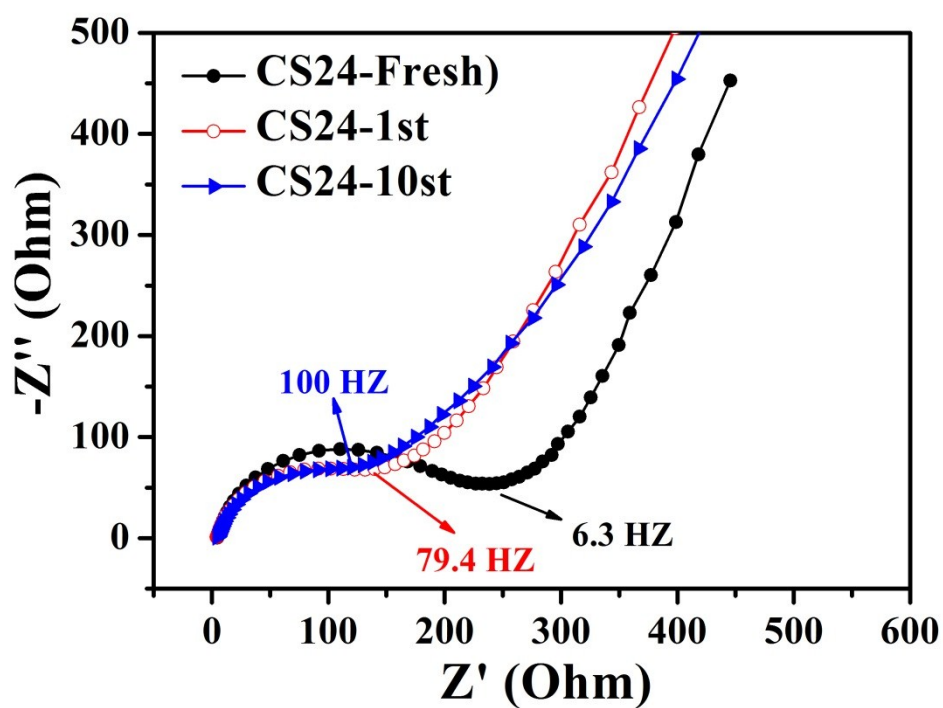

Fig.S11 Electrochemical impedance spectroscopy (EIS) of CSA24 electrodes for fresh, after 1st and 10st cycled in the frequency range 100000 Hz to 0.01 Hz at 5 mV amplitude.

Table S1 The compositions of CSA and various CuSn samples (CS12, CS24, CS48).

|                                       | <b>CSA (Cu: Sn: Al)</b> | <b>CS12</b> | <b>CS24</b> | <b>CS48</b> |
|---------------------------------------|-------------------------|-------------|-------------|-------------|
| <b>Cu: Sn</b><br><b>(molar ratio)</b> | 17: 7: 76               | 47: 41      | 54: 37      | 57: 35      |
